# Supplementary material for: Attitudes and Determinants of Mandatory Vaccination against COVID-19 among the General Population of Cyprus: A Nationwide Cross-Sectional Study
Source: MDPI journal article supplement (doi:10.3390/vaccines10030438), 2022-03-13

**Figure S1.** Participants' reasons for COVID-19 vaccination and reasons for hesitating to get vaccinated against COVID-19.

**Reasons for COVID-19 vaccination (N=2740; multiple answers)**

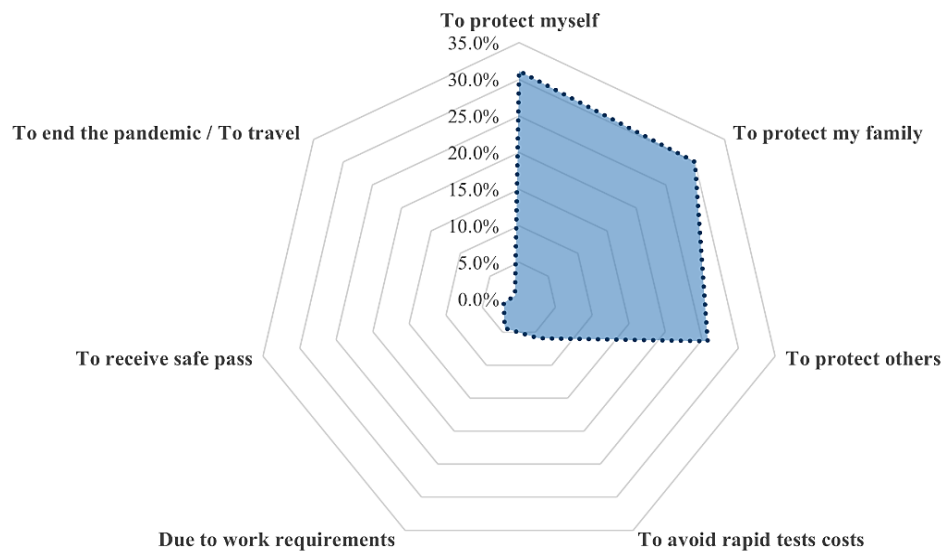

**Reasons for hesitating to get vaccinated against COVID-19 (N=2814; multiple answers)**

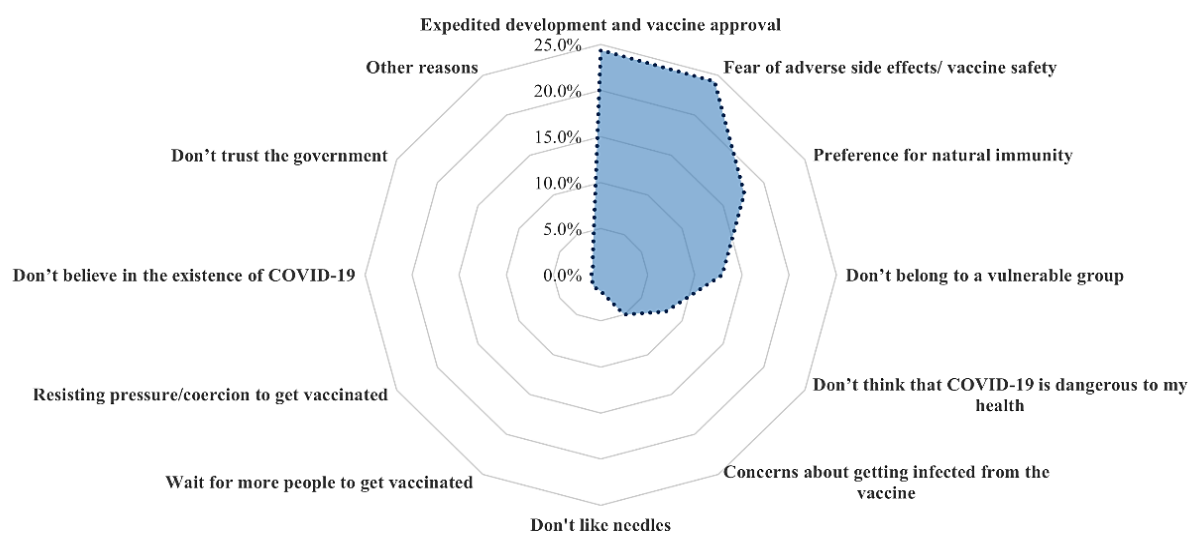

Supplement: s1 [file s1]
