# Supplementary material for: Attitudes and Determinants of Mandatory Vaccination against COVID-19 among the General Population of Cyprus: A Nationwide Cross-Sectional Study
Source: MDPI journal article supplement (doi:10.3390/vaccines10030438), 2022-03-13
Supplement: s1 [file s1]

| Table S2. Participants' general vaccination knowledge overall and by mandatory vaccination support.                                                                                                                                                                                                                                                           |                       |                                |                  |                    |
|---------------------------------------------------------------------------------------------------------------------------------------------------------------------------------------------------------------------------------------------------------------------------------------------------------------------------------------------------------------|-----------------------|--------------------------------|------------------|--------------------|
|                                                                                                                                                                                                                                                                                                                                                               | Overall<br>(N = 2140) | Mandatory COVID-19 vaccination |                  |                    |
|                                                                                                                                                                                                                                                                                                                                                               |                       | No<br>(N = 1539)               | Yes<br>(N = 594) | p-value            |
| The flu is caused by bacteria [N <sup>a</sup> (%)]                                                                                                                                                                                                                                                                                                            |                       |                                |                  |                    |
| True                                                                                                                                                                                                                                                                                                                                                          | 669 (31.6)            | 508 (75.9)                     | 161 (24.1)       | 0.019 <sup>j</sup> |
| I do not know                                                                                                                                                                                                                                                                                                                                                 | 532 (25.2)            | 367 (69.2)                     | 163 (30.8)       |                    |
| False                                                                                                                                                                                                                                                                                                                                                         | 913 (43.2)            | 642 (70.6)                     | 267 (29.4)       |                    |
| The main route of influenza transmission is through respiratory secretions [N <sup>b</sup> (%)]                                                                                                                                                                                                                                                               |                       |                                |                  |                    |
| True                                                                                                                                                                                                                                                                                                                                                          | 1766 (83.5)           | 1247 (70.7)                    | 517 (29.3)       | 0.014 <sup>j</sup> |
| I do not know                                                                                                                                                                                                                                                                                                                                                 | 238 (11.2)            | 180 (76.6)                     | 55 (23.4)        |                    |
| False                                                                                                                                                                                                                                                                                                                                                         | 112 (5.3)             | 90 (81.1)                      | 21 (18.9)        |                    |
| There is a vaccine to prevent cervical cancer [N <sup>c</sup> (%)]                                                                                                                                                                                                                                                                                            |                       |                                |                  |                    |
| True                                                                                                                                                                                                                                                                                                                                                          | 1826 (86.0)           | 1277 (70.1)                    | 545 (29.9)       | <0.01 <sup>j</sup> |
| I do not know                                                                                                                                                                                                                                                                                                                                                 | 236 (11.1)            | 198 (84.6)                     | 36 (15.4)        |                    |
| False                                                                                                                                                                                                                                                                                                                                                         | 61 (2.9)              | 50 (82.0)                      | 11 (18.0)        |                    |
| Some vaccines contain live but attenuated microorganisms [N <sup>b</sup> (%)]                                                                                                                                                                                                                                                                                 |                       |                                |                  |                    |
| True                                                                                                                                                                                                                                                                                                                                                          | 1562 (73.8)           | 1136 (72.9)                    | 423 (27.1)       | 0.177 <sup>j</sup> |
| I do not know                                                                                                                                                                                                                                                                                                                                                 | 434 (20.5)            | 305 (70.6)                     | 127 (29.4)       |                    |
| False                                                                                                                                                                                                                                                                                                                                                         | 120 (5.7)             | 78 (65.5)                      | 41 (34.5)        |                    |
| Most vaccines contain adjuvants to enhance vaccine effectiveness [N <sup>d</sup> (%)]                                                                                                                                                                                                                                                                         |                       |                                |                  |                    |
| True                                                                                                                                                                                                                                                                                                                                                          | 701 (33.2)            | 490 (70.0)                     | 210 (30.0)       | 0.011 <sup>j</sup> |
| I do not know                                                                                                                                                                                                                                                                                                                                                 | 1341 (63.5)           | 965 (72.2)                     | 371 (27.8)       |                    |
| False                                                                                                                                                                                                                                                                                                                                                         | 69 (3.3)              | 60 (87.0)                      | 9 (13.0)         |                    |
| The vaccine is a preventive measure [N <sup>e</sup> (%)]                                                                                                                                                                                                                                                                                                      |                       |                                |                  |                    |
| True                                                                                                                                                                                                                                                                                                                                                          | 1699 (80.9)           | 1117 (65.9)                    | 577 (34.1)       | <0.01 <sup>j</sup> |
| I do not know                                                                                                                                                                                                                                                                                                                                                 | 175 (8.3)             | 172 (98.3)                     | 3 (1.7)          |                    |
| False                                                                                                                                                                                                                                                                                                                                                         | 225 (10.8)            | 211 (94.2)                     | 13 (5.8)         |                    |
| The transmission of pathogenic microorganisms occurs only through infected individuals [N <sup>f</sup> (%)]                                                                                                                                                                                                                                                   |                       |                                |                  |                    |
| True                                                                                                                                                                                                                                                                                                                                                          | 1381 (65.8)           | 946 (68.7)                     | 431 (31.3)       | <0.01 <sup>j</sup> |
| I do not know                                                                                                                                                                                                                                                                                                                                                 | 519 (24.7)            | 404 (78.1)                     | 113 (21.9)       |                    |
| False                                                                                                                                                                                                                                                                                                                                                         | 198 (9.5)             | 150 (75.8)                     | 48 (24.2)        |                    |
| The measles/mumps/rubella (MMR) vaccine is associated with autism [N <sup>g</sup> (%)]                                                                                                                                                                                                                                                                        |                       |                                |                  |                    |
| True                                                                                                                                                                                                                                                                                                                                                          | 213 (10.1)            | 197 (92.5)                     | 16 (7.5)         | <0.01 <sup>j</sup> |
| I do not know                                                                                                                                                                                                                                                                                                                                                 | 1049 (49.8)           | 838 (80.1)                     | 208 (19.9)       |                    |
| False                                                                                                                                                                                                                                                                                                                                                         | 844 (40.1)            | 474 (56.4)                     | 367 (43.6)       |                    |
| If a person is vaccinated, the possibilities of transmitting the disease are higher [N <sup>e</sup> (%)]                                                                                                                                                                                                                                                      |                       |                                |                  |                    |
| True                                                                                                                                                                                                                                                                                                                                                          | 341 (16.3)            | 321 (94.4)                     | 19 (5.6)         | <0.01 <sup>j</sup> |
| I do not know                                                                                                                                                                                                                                                                                                                                                 | 418 (19.9)            | 395 (94.7)                     | 22 (5.3)         |                    |
| False                                                                                                                                                                                                                                                                                                                                                         | 1340 (63.8)           | 785 (58.8)                     | 551 (41.2)       |                    |
| Vaccines are unnecessary, as viruses can be treated with antibiotics [N <sup>h</sup> (%)]                                                                                                                                                                                                                                                                     |                       |                                |                  |                    |
| True                                                                                                                                                                                                                                                                                                                                                          | 235 (11.1)            | 231 (98.7)                     | 3 (1.3)          | <0.01 <sup>j</sup> |
| I do not know                                                                                                                                                                                                                                                                                                                                                 | 300 (14.2)            | 278 (93.0)                     | 21 (7.0)         |                    |
| False                                                                                                                                                                                                                                                                                                                                                         | 1574 (74.7)           | 1001 (63.8)                    | 569 (36.2)       |                    |
| Vaccination needs to be done for diseases that have been eliminated [N <sup>i</sup> (%)]                                                                                                                                                                                                                                                                      |                       |                                |                  |                    |
| True                                                                                                                                                                                                                                                                                                                                                          | 943 (44.7)            | 561 (59.7)                     | 379 (40.3)       | <0.01 <sup>j</sup> |
| I do not know                                                                                                                                                                                                                                                                                                                                                 | 638 (30.2)            | 504 (79.4)                     | 131 (20.6)       |                    |
| False                                                                                                                                                                                                                                                                                                                                                         | 531 (25.1)            | 450 (84.7)                     | 81 (15.3)        |                    |
| Vaccination increases the incidence of allergies [N <sup>d</sup> (%)]                                                                                                                                                                                                                                                                                         |                       |                                |                  |                    |
| True                                                                                                                                                                                                                                                                                                                                                          | 529 (25.1)            | 502 (95.1)                     | 26 (4.9)         | <0.01 <sup>j</sup> |
| I do not know                                                                                                                                                                                                                                                                                                                                                 | 999 (47.3)            | 754 (75.8)                     | 241 (24.2)       |                    |
| False                                                                                                                                                                                                                                                                                                                                                         | 583 (27.6)            | 257 (44.2)                     | 325 (55.8)       |                    |
| <sup>a</sup> N=2114; <sup>b</sup> N=2116; <sup>c</sup> N=2123; <sup>d</sup> N=2111; <sup>e</sup> N=2099; <sup>f</sup> N=2098; <sup>g</sup> N=2106; <sup>h</sup> N=2109; <sup>i</sup> N=2112; <sup>j</sup> Differences between mandatory COVID-19 vaccination groups were tested using chi2 test: Bold values indicate statistically significant associations. |                       |                                |                  |                    |
