# Supplementary material for: Attitudes and Determinants of Mandatory Vaccination against COVID-19 among the General Population of Cyprus: A Nationwide Cross-Sectional Study
Source: MDPI journal article supplement (doi:10.3390/vaccines10030438), 2022-03-13
Supplement: s1 [file s1]

**Table S1.** Information about participants' COVID-19 vaccination, overall and by mandatory vaccination support.

| COVID-19 vaccination                                                                                                         | Overall<br>(N = 2140) | Mandatory COVID-19 vaccination |                  |                    |
|------------------------------------------------------------------------------------------------------------------------------|-----------------------|--------------------------------|------------------|--------------------|
|                                                                                                                              |                       | No<br>(N = 1539)               | Yes<br>(N = 594) | p-value            |
| Vaccination status [N <sup>a</sup> (%)]                                                                                      |                       |                                |                  |                    |
| No                                                                                                                           | 974 (46.0)            | 967 (99.4)                     | 6 (0.6)          | <0.01 <sup>h</sup> |
| Yes                                                                                                                          | 1143 (54.0)           | 555 (48.8)                     | 583 (51.2)       |                    |
| Number of doses [N <sup>b</sup> (%)]                                                                                         |                       |                                |                  |                    |
| 1                                                                                                                            | 77 (6.6)              | 61 (79.2)                      | 16 (20.8)        | <0.01 <sup>h</sup> |
| 2                                                                                                                            | 760 (65.6)            | 405 (53.5)                     | 352 (46.5)       |                    |
| 3                                                                                                                            | 322 (27.8)            | 99 (30.9)                      | 221 (69.1)       |                    |
| Type of COVID-19 vaccine [N <sup>c</sup> (%)]                                                                                |                       |                                |                  |                    |
| Pfizer                                                                                                                       | 792 (68.3)            | 377 (47.7)                     | 413 (52.3)       | 0.001 <sup>h</sup> |
| Moderna                                                                                                                      | 145 (12.5)            | 81 (56.2)                      | 63 (43.8)        |                    |
| Astra Zeneca                                                                                                                 | 119 (10.3)            | 47 (40.2)                      | 70 (59.8)        |                    |
| Johnson & Johnson                                                                                                            | 64 (5.5)              | 45 (70.3)                      | 19 (26.7)        |                    |
| Sputnik                                                                                                                      | 3 (0.3)               | 1 (33.3)                       | 2 (66.7)         |                    |
| Combination                                                                                                                  | 37 (3.1)              | 14 (37.8)                      | 23 (62.2)        |                    |
| Intention to receive another dose if requested [N <sup>d</sup> (%)]                                                          |                       |                                |                  |                    |
| Not at all                                                                                                                   | 226 (17.8)            | 220 (97.3)                     | 6 (2.7)          | <0.01 <sup>h</sup> |
| Little                                                                                                                       | 74 (5.8)              | 64 (90.1)                      | 7 (9.9)          |                    |
| Moderate                                                                                                                     | 147 (11.6)            | 116 (78.9)                     | 31 (21.1)        |                    |
| A lot                                                                                                                        | 299 (23.5)            | 131 (44.0)                     | 167 (56.0)       |                    |
| Very much                                                                                                                    | 525 (41.3)            | 146 (27.9)                     | 378 (72.1)       |                    |
| Belief that vaccine helped to prevent COVID-19 disease? [N <sup>e</sup> (%)]                                                 |                       |                                |                  |                    |
| Not at all                                                                                                                   | 238 (17.6)            | 232 (97.5)                     | 6 (2.5)          | <0.01 <sup>h</sup> |
| Little                                                                                                                       | 131 (9.7)             | 125 (96.2)                     | 5 (3.8)          |                    |
| Moderate                                                                                                                     | 229 (16.9)            | 161 (70.6)                     | 67 (29.4)        |                    |
| A lot                                                                                                                        | 384 (28.4)            | 166 (43.3)                     | 217 (56.7)       |                    |
| Very much                                                                                                                    | 370 (27.4)            | 74 (20.1)                      | 294 (79.9)       |                    |
| If you have not received the COVID-19 vaccine to date, do you plan to receive it? [N <sup>f</sup> (%)]                       |                       |                                |                  |                    |
| I do not know                                                                                                                | 174 (17.3)            | 172 (98.8)                     | 2 (1.2)          | <0.01 <sup>h</sup> |
| No                                                                                                                           | 805 (80.2)            | 800 (99.5)                     | 4 (0.5)          |                    |
| Yes                                                                                                                          | 25 (2.5)              | 18 (72.0)                      | 7 (28.0)         |                    |
| They belong to a vulnerable group (diabetic, immunosuppressed, etc.) to whom vaccination is recommended [N <sup>g</sup> (%)] |                       |                                |                  |                    |
| I do not know                                                                                                                | 94 (4.5)              | 66 (70.2)                      | 28 (29.8)        | <0.01 <sup>h</sup> |
| No                                                                                                                           | 1764 (84.3)           | 1310 (74.5)                    | 449 (25.5)       |                    |
| Yes                                                                                                                          | 235 (11.2)            | 142 (60.7)                     | 92 (39.3)        |                    |

<sup>a</sup>N=2117; <sup>b</sup>N=1159; <sup>c</sup>N=1160; <sup>d</sup>N=1271; <sup>e</sup>N=1352; <sup>f</sup>N=1004; <sup>g</sup>N=2093; <sup>h</sup>Differences between mandatory COVID-19 vaccination groups were tested using chi<sup>2</sup> test; Bold values indicate statistically significant associations.
